22 mathematical theory of branching processes. Under that theory, the probability of  
23 pathogen extinction is estimated, neglecting depletion of susceptible individuals. The  
24 CER is then one minus the extinction probability. However, as we show, if transmission  
25 cannot occur for long periods of the year (e.g., over winter or over summer), the  
26 pathogen will inevitably go extinct, leading to a CER of zero even if seasonal outbreaks  
27 can occur. This renders the CER uninformative in those scenarios. We therefore devise  
28 an alternative approach for inferring outbreak risks for seasonal pathogens (involving  
29 calculating the Threshold Epidemic Risk; TER). Estimation of the TER involves  
30 calculating the probability that introduced cases will initiate a local outbreak in which a  
31 threshold number of infections is exceeded before outbreak extinction. For simple  
32 seasonal epidemic models, such as the stochastic Susceptible-Infectious-Removed  
33 model, the TER can be calculated numerically (without model simulations). For more  
34 complex models, such as stochastic host-vector models, the TER can be estimated  
35 using model simulations. We demonstrate the application of our approach by  
36 considering Chikungunya virus in northern Italy as a case study. In that context,  
37 transmission is most likely in summer, when environmental conditions promote vector  
38 abundance. We show that the TER provides more useful assessments of outbreak risks  
39 than the CER, enabling practically relevant risk quantification for seasonal pathogens.

40

41

### **Author Summary**

42 Invasive pathogens pose a challenge to human health, particularly as outbreak risks for  
43 some infectious diseases are being exacerbated by climate change. For example, the  
44 occurrence of seasonal vector-borne disease outbreaks in mainland Europe is

45 increasing, even though pathogens like the Chikungunya and dengue viruses are not  
46 normally present there. In this changing landscape, assessing the risk posed by invasive  
47 pathogens requires computational methods for estimating the probability that  
48 introduced cases will lead to a local outbreak, as opposed to the first few cases fading  
49 out without causing a local outbreak. In this article, we therefore provide a  
50 computational framework for estimating the risk that introduced cases will lead to a  
51 local outbreak in which a pre-specified, context specific threshold number of cases is  
52 exceeded (we term this risk the “Threshold Epidemic Risk”, or TER). Since even small  
53 seasonal outbreaks can have negative impacts on local populations, we demonstrate  
54 that calculation of the TER provides more appropriate estimates of local outbreak risks  
55 than those inferred using standard methods. Going forwards, our computational  
56 modelling framework can be used to assess outbreak risks for a wide range of seasonal  
57 diseases.

58

59

## **1. Introduction**

60 Even if a pathogen is not commonly present in a host population, there remains a risk  
61 that imported cases will lead to local transmission [1–5]. In southern Europe, for  
62 example, vector-borne diseases such as dengue and chikungunya are not endemic, yet  
63 outbreaks occur due to pathogen importation followed by autochthonous (i.e., local)  
64 transmission [6–8]. The risk that imported cases will lead to a substantial local  
65 outbreak, as opposed to sporadic onwards transmissions occurring, varies seasonally.  
66 This is because factors such as host behaviour, pathogen survivability and vector  
67 ecological dynamics change during the year, and are affected by weather variables such

68 as temperature, rainfall and humidity [9–12]. It is useful to identify times of year at which  
69 outbreaks are most likely, and to provide quantitative estimates of temporally varying  
70 outbreak risks, to inform vector or pathogen surveillance and control interventions.

71 Previous work on the topic of inferring the risk that introduced cases will initiate  
72 sustained local transmission has focussed on estimating the so-called “probability of a  
73 major outbreak”, based on the number of imported cases and the transmissibility of the  
74 pathogen. This probability can be inferred both for pathogens that are transmitted  
75 directly between hosts [13–26] and those that are spread via vectors [27–30].

76 Furthermore, the probability of a major outbreak has been calculated in systems in  
77 which transmission parameter values are assumed to be constant [8,30–33] and those  
78 in which temporal variations in transmission are accounted for [29,34–41]. Estimates of  
79 the probability of a major outbreak have been generated using approximations of a wide  
80 range of epidemiological models, including SIS, SIR and SEIR models [30,31], spatial  
81 models [22,23,27], models with host demography [25,26,42] and models that relax the  
82 standard assumption that epidemiological time periods are drawn from exponential  
83 distributions [24,43]. In addition, calculations of the probability of a major outbreak  
84 have been undertaken for a wide variety of diseases, including COVID-19 [21,32], Ebola  
85 [31,43] and dengue [8,44].

86 In all these different settings, the probability of a major outbreak is typically derived by  
87 assuming that infections are generated according to a branching process [45],  
88 neglecting depletion of susceptible individuals (i.e., assuming that there is a constant  
89 supply of susceptible hosts available for each infected individual to infect). When  
90 transmission parameter values do not vary temporally, under this assumption a

91 pathogen either goes extinct following its introduction or the number of infections grows  
92 unboundedly. The probability of a major outbreak calculated in this way corresponds to  
93 the probability that the second of these scenarios arises (i.e., that infinitely many  
94 infections occur in the branching process model). Generally, this is appropriate, and  
95 estimates of the probability of a major outbreak match the proportion of simulations of  
96 stochastic compartmental models (that account for depletion of susceptible  
97 individuals) in which “large” outbreaks occur, at least when parameters take constant  
98 values and  $R_0$  is sufficiently larger than one [29,30]. However, the use of branching  
99 process theory to estimate outbreak risks can be problematic when transmission is  
100 seasonal.

101 Specifically, when transmission can only occur during some periods of the year, the  
102 pathogen will inevitably go extinct in seasons when environmental conditions are  
103 unsuitable for transmission. Consequently, even with a constant supply of susceptible  
104 individuals for infected hosts to infect, the number of infections will not grow  
105 indefinitely. As a result, standard analytic estimates of the probability of a major  
106 outbreak (here called the Case Epidemic Risk, or CER, following the use of this  
107 terminology previously for pathogens for which transmission varies temporally [29]) are  
108 vanishingly small. Since pathogen extinction will almost certainly occur, a more  
109 practically relevant question is how many infections will there be before extinction? If a  
110 substantial number of infections arises prior to pathogen extinction, we contend that an  
111 outbreak should still be classified as “major”.

112 Here, we therefore provide a new metric for calculating the probability of a major  
113 outbreak for seasonal pathogens. Specifically, we calculate the probability that,

114 following the introduction of a pathogen to a host population, a pre-specified, context  
115 dependent threshold number of total infections is exceeded. We refer to this metric as  
116 the Threshold Epidemic Risk (TER). This metric can be calculated using stochastic  
117 compartmental transmission models that account for both seasonality and depletion of  
118 susceptible individuals, and throughout this article we compare calculations of the TER  
119 to analogous values of the CER. A schematic is shown in Fig 1, illustrating that when  
120 transmission varies seasonally (Fig 1A) then any outbreak may be likely to fade out as  
121 soon as a season arrives that is not conducive to transmission (leading to a CER of zero;  
122 Fig 1B). However, even in that scenario, seasonal outbreaks may still lead to substantial  
123 numbers of cases (the TER may be larger than zero; Fig 1C).

124 First, we show how the TER can be calculated numerically (i.e., through the numerical  
125 solution of a system of equations, without requiring model simulations) for the  
126 stochastic SIR model with seasonally varying transmission. Then, we show how the TER  
127 can be calculated for more complex models using stochastic simulations by  
128 considering a stochastic host-vector model of Chikungunya virus transmission in  
129 northern Italy. When transmission is possible all year round, the TER and CER can give  
130 similar estimates. However, for both models, when there are substantial periods of the  
131 year during which sustained transmission is not possible, the difference between  
132 outbreak risk estimates arising from these two metrics can be large. For Chikungunya  
133 virus, which is spread by *Aedes albopictus*, there are long periods of the year in northern  
134 Italy during which vector abundance is too low for virus transmission [8]. Consequently,  
135 the CER is zero, yet major outbreaks due to local transmission can sometimes occur,  
136 depending on the precise definition of a “major outbreak” used. Since a policy-maker  
137 can choose a practically relevant threshold when estimating the TER, it is a useful

138 quantity to consider when quantifying seasonal outbreak risks as an aid for public  
139 health policy making.

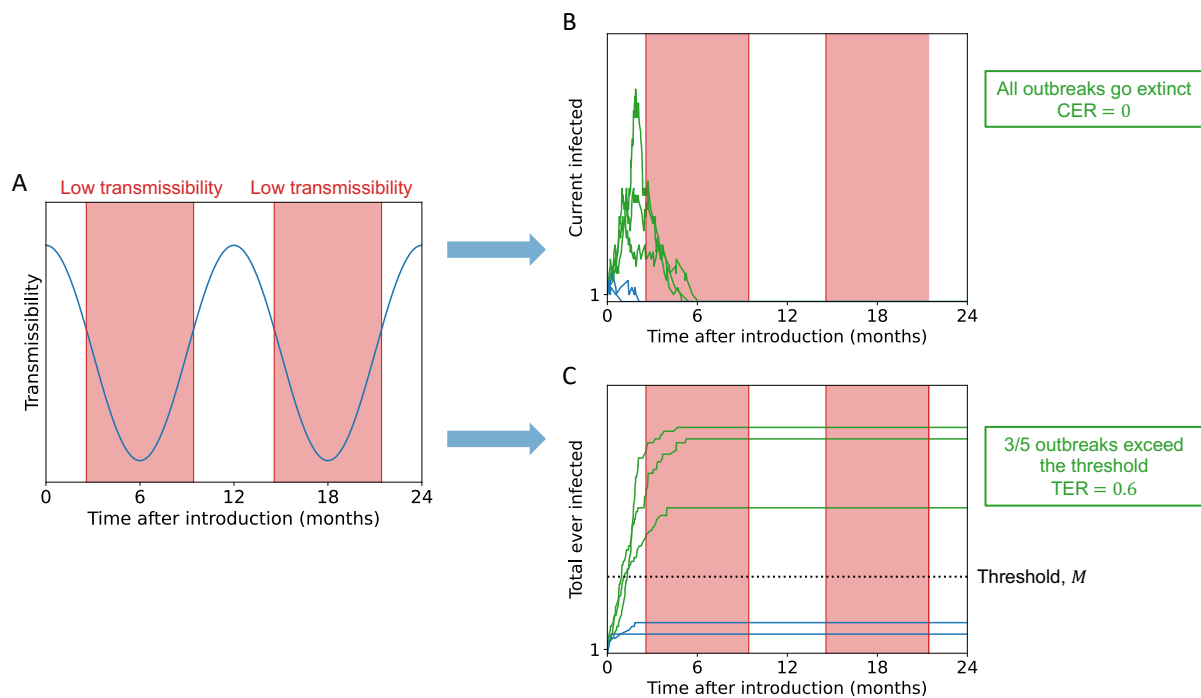

140

141 **Figure 1. Schematic illustrating the difference in outbreak risk assessments for seasonal pathogens**

142 **obtained using the CER and TER. A. Seasonal pathogen transmission comprises of periods of high and**

143 **low transmissibility (low transmissibility periods, during which sustained pathogen transmission is**

144 **impossible, are shaded in red). B. In the scenario considered here, all outbreaks go extinct during low**

145 **transmissibility periods, leading to the CER taking the value zero. C. Despite all outbreaks going extinct,**

146 **there is the potential for some outbreaks to generate a substantial number of cases. In this illustrative**

147 **example, three out of every five outbreaks generate numbers of cases that exceed a pre-specified**

148 **threshold,  $M$ , leading to a TER value of 0.6. In panels B and C, outbreaks that generate numbers of cases**

149 **that exceed  $M$  are shown as green lines and those that do not are shown as blue lines.**

150

## 2. Methods

### 151 2.1 Epidemiological models

#### 152 2.1.1 SIR model

153 The ordinary differential equation (ODE) version of the Susceptible-Infectious-Removed  
154 (SIR) model with time-dependent infection and removal rates is:

$$\begin{aligned} 155 \quad \frac{dS(t)}{dt} &= -\frac{\beta(t)S(t)I(t)}{N}, \\ 156 \quad \frac{dI(t)}{dt} &= \frac{\beta(t)S(t)I(t)}{N} - \gamma(t)I(t), \\ 157 \quad \frac{dR(t)}{dt} &= \gamma(t)I(t). \end{aligned} \quad (1)$$

158 In this model,  $S(t)$  is the number of individuals who are susceptible to the pathogen at  
159 time  $t$ ,  $I(t)$  is the number of infectious individuals, and  $R(t)$  is the number of removed  
160 individuals (including those who have recovered and become immune and those who  
161 have died). The total population size,  $S(t) + I(t) + R(t) = N$ , is constant under this  
162 model. In our analyses, the analogous stochastic model is considered, and simulations  
163 are run using a modified version of the Gillespie direct method [46] in which time-  
164 dependent rates are accounted for [29,47,48] (Text S1.2, Algorithm 1). For this model,  
165 the instantaneous basic reproduction number is given by  $R_0(t) = \frac{\beta(t)}{\gamma(t)}$ .

166 Time  $t$  is measured in months and the infection rate is chosen to be periodic with a  
167 period of 12 months:

$$168 \quad \beta(t) = \max\left(\beta_0 + \beta_1 \cos\left(\frac{\pi}{6}t - \phi\right), 0\right). \quad (2)$$



169 The removal rate is assumed to be constant ( $\gamma(t) = \gamma$ ). We use these specific forms of  
170 the infection and removal rates in our analyses but our approach for computing the TER  
171 can be applied for any functions  $\beta(t)$  and  $\gamma(t)$  (the functions do not even need to be  
172 periodic). The parameter values used are shown in the captions to Figures 2-4.

### 173 2.1.2 Chikungunya transmission model

174 We adapt the ODE model of Chikungunya virus transmission described by Guzzetta *et*  
175 *al.* [8,44]. Specifically, we separate the vector ecological dynamics from the host-vector  
176 epidemiological dynamics. The ecological model is given by:

$$\begin{aligned} 177 \quad \frac{dE}{dt} &= n_E d_V(T(t)) N_V - \left( m_E(T(t)) + d_E(T(t)) \right) E, \\ 178 \quad \frac{dL}{dt} &= d_E(T(t)) E - \left[ m_L(T(t)) \left( 1 + \frac{L}{a_s} \right) + d_L(T(t)) \right] L, \\ 179 \quad \frac{dP}{dt} &= d_L(T(t)) L - \left( m_P(T(t)) + d_P(T(t)) \right) P, \\ 180 \quad \frac{dN_V}{dt} &= \frac{1}{2} d_P(T(t)) P - m_V(T(t)) N_V. \quad (3) \end{aligned}$$

181 In this model, the population of vectors (*Ae. albopictus*) is split into eggs ( $E$ ), larvae ( $L$ ),  
182 pupae ( $P$ ) and adults ( $N_V$ ). For notational convenience, we do not denote the  
183 dependence of these state variables on  $t$  in the equations above explicitly, although the  
184 number of vectors in each compartment of the model varies temporally. The factor of  
185  $1/2$  in the equation for  $N_V$  reflects the fact that we only track adult female vectors, since  
186 male vectors do not spread the virus. The spatial scale of the model is assumed to be a  
187 single hectare (so that  $N_V$  represents the number of adult female vectors in one  
188 hectare). The effect of overcrowded breeding sites on the larval mortality rate is

189 determined by the overcrowding parameter,  $a_s$ , which was fitted to vector capture data  
190 by Guzzetta *et al.* [8,44].

191 The temperature,  $T(t)$ , is assumed to vary seasonally (i.e., with period 12 months):

192 
$$T(t) = T_0 + T_1 \cos\left(\frac{\pi}{6}t - \psi\right). \quad (4)$$

193 The values of  $T_0$ ,  $T_1$  and  $\psi$  were determined by fitting  $T(t)$  to daily mean temperature  
194 data (measured in Celsius) from Feltre, a town in northern Italy, separately for both 2014  
195 and 2015 (data were obtained from MODIS satellite Land Surface Temperature  
196 measurements as detailed in [8]) using least squares estimation. In our analysis of the  
197 temperature data from 2014, time  $t = 0$  corresponds to 1<sup>st</sup> April 2014. In our analysis of  
198 the data from 2015, time  $t = 0$  corresponds to 1<sup>st</sup> April 2015.

199 We solve the ecological model (system of equations (3)) numerically to obtain  $N_V(t)$ . To  
200 facilitate straightforward computation of the CER (see below), we then fit a skewed and  
201 scaled Gaussian to the monthly values of  $N_V(t)$  using least squares estimation, and use  
202 the resulting fitted version of  $N_V(t)$  in all of our analyses. Again, we perform this fitting  
203 separately for 2014 and 2015. The fitted curve is of the form:

204 
$$N_V(t) = AB^{-\frac{(t-C)^2}{D}} \left[ 1 + \operatorname{erf}\left(\frac{t-C}{E}\right) \right], \quad (5)$$

205 in which erf is the error function. By considering the deterministic version of the  
206 ecological model, we avoid running stochastic simulations of the ecological model,  
207 which would be computationally expensive due to the large number of events that  
208 would arise in that system.

209 Stochastic epidemiological dynamics are then simulated using a stochastic host-vector  
210 model. The analogous deterministic model to the stochastic model that we consider is:

$$\begin{aligned} 211 \quad \frac{dS_V}{dt} &= -k\beta_V \frac{S_V I_H}{N} - m_V(T(t))S_V, \\ 212 \quad \frac{dE_V}{dt} &= k\beta_V \frac{S_V I_H}{N} - \left( \frac{1}{\omega_V} + m_V(T(t)) \right) E_V, \\ 213 \quad \frac{dI_V}{dt} &= \frac{1}{\omega_V} E_V - m_V(T(t))I_V, \\ 214 \quad \frac{dS_H}{dt} &= -k\beta_H \frac{S_H I_V}{N}, \\ 215 \quad \frac{dI_H}{dt} &= k\beta_H \frac{S_H I_V}{N} - \frac{1}{\tau} I_H, \\ 216 \quad \frac{dR_H}{dt} &= \frac{1}{\tau} I_H. \quad (6) \end{aligned}$$

217 In this model, it is assumed that, after entering the  $I_V$  compartment, an adult female  
218 vector remains infectious for life. The temperature-dependent rates in systems of  
219 equations (3) and (6) are explicitly labelled as a function of temperature,  $T$ , which itself  
220 varies temporally. For definitions of each of the parameters in systems of equations (3) and  
221 (6), and the values used in our analyses (including functional forms of the temperature-  
222 dependent parameters), see Table S1.1. Unlike the total host population size, which  
223 remains constant ( $S_H + I_H + R_H = N$ ), the vector population size,  $N_V$ , varies with  
224 temperature and therefore varies temporally (equation (5)). The equation for the  
225 instantaneous basic reproduction number,  $R_0(t)$ , for this system is [8]:

$$226 \quad R_0(t) = k^2 \beta_H \beta_V \frac{\tau}{m_V(T(t))} \frac{N_V}{N} \frac{1}{1 + \omega_V m_V(T(t))}. \quad (7)$$

227 When we run stochastic simulations of system of equations (6), we again adapt the  
228 Gillespie direct method [46] (Text S1.2, Algorithm 2). We assume that transmission  
229 parameters take constant values within each day (given by their values at the start of the  
230 day). We are therefore able to use the Gillespie direct method within each day. At the  
231 end of each day, we compare the total vector population size,  $S_V + E_V + I_V$ , with  $N_V$  (as  
232 determined by equation (5)). If  $S_V + E_V + I_V < N_V$ , then we assume that new  
233 susceptible vectors are born (i.e., we increase  $S_V$ ) until  $S_V + E_V + I_V = N_V$ . If instead  
234  $S_V + E_V + I_V > N_V$ , we select vectors uniformly at random to die until  $S_V + E_V + I_V =$   
235  $N_V$ , since the per-vector death rates in system of equations (6) are equal for each of the  
236  $S_V$ ,  $E_V$  and  $I_V$  compartments. By following this procedure, we simulate stochastic  
237 epidemiological dynamics while remaining consistent with the deterministic ecological  
238 dynamics (system of equations (3) and equation (5)).

## 239 **2.2 Case Epidemic Risk (CER)**

240 As described in the Introduction, a standard approach for estimating the probability of a  
241 major outbreak exists, involving the assumptions that infections occur according to a  
242 branching process and a constant supply of susceptible individuals is available for  
243 each infectious host to infect. This approach has been used previously in the context of  
244 pathogens for which transmission parameters vary temporally (e.g., [29,34,40]). Here,  
245 we refer to the probability of a major outbreak calculated in this way as the CER,  
246 following the use of this terminology in our earlier work [29]. In this section, we describe  
247 how the CER can be calculated for the stochastic SIR model and the stochastic host-  
248 vector model of Chikungunya virus transmission.

## 249 2.2.1 SIR model

250 For the stochastic SIR model, if a single infectious individual enters the host population  
251 at time  $t_0$ , then the CER is given by [29,34,40]:

$$252 \quad \text{CER}(t_0) = \frac{1}{1 + \int_{t_0}^{\infty} \gamma(r) e^{-\int_{t_0}^r \beta(s) - \gamma(s) ds} dr}. \quad (8)$$

253 A derivation of this expression can be found in Section 2.3.1 of [29].

## 254 2.2.2 Chikungunya transmission model

255 To compute the CER for the host-vector model of Chikungunya virus transmission, we  
256 use the method described in [29]. We denote the probability of a major outbreak  
257 occurring, if there are  $i$  infectious hosts,  $j$  exposed vectors and  $k$  infectious vectors at  
258 time  $t$ , by  $p_{ijk}(t)$ .

259 Assuming that the virus is introduced into the population at time  $t_0$  by a single  
260 infectious host, then the CER is given by  $p_{100}(t_0)$ . Calculation of the CER then involves  
261 solving the following system of ODEs:

$$262 \quad \frac{dp_{100}(t)}{dt} = \frac{k\beta_V N_V(t)}{N} [p_{100}(t) - 1] p_{010}(t) + \frac{1}{\tau} p_{100}(t),$$

$$263 \quad \frac{dp_{010}(t)}{dt} = -\frac{1}{\omega_V} p_{001}(t) + \left[ m_V(t) + \frac{1}{\omega_V} \right] p_{010}(t),$$

$$264 \quad \frac{dp_{001}(t)}{dt} = k\beta_H p_{100}(t) [p_{001}(t) - 1] + m_V(t) p_{001}(t). \quad (9)$$

265 The first of these equations is derived in Text S1.3 with the derivation of the remaining  
266 two equations following an identical procedure. We numerically solve system of  
267 equations (9) using the Chebfun open source MATLAB software package [49], with  
268 periodic boundary conditions ( $p_{100}(0) = p_{100}(12)$ ,  $p_{010}(0) = p_{010}(12)$  and  $p_{001}(0) =$

269  $p_{001}(12)$ ). Chebfun requires the coefficients of  $p_{100}$ ,  $p_{010}$  and  $p_{001}$  on the right-hand-  
270 side of system of equations (9) to be provided in functional forms (as functions of  $t$ ,  
271 rather than vectors of values), necessitating our decision to use a functional form for  
272  $N_V(t)$  (equation (5)).

### 273 **2.3 Threshold Epidemic Risk (TER)**

274 Here, we describe how the TER can be calculated for the stochastic SIR model and  
275 stochastic host-vector model of Chikungunya virus transmission. The TER represents  
276 the probability that, if a single infected individual (for the host-vector model, a single  
277 infected host) enters the population at time  $t_0$ , an outbreak with more than a threshold  
278 number (denoted  $M$ ) of infections follows. For the host-vector model, this threshold  
279 refers to the total number of host infections.

#### 280 **2.3.1 SIR model**

281 For the stochastic SIR model, we calculate the TER numerically, without resorting to  
282 model simulation. To do this, we choose a time,  $t_{\max}$ , that is longer than any outbreak  
283 could potentially be. We then denote the probability that the total number of infections  
284 exceeds  $M$  prior to time  $t_{\max}$ , given that there are  $I^*$  infectious individuals and  $R^*$   
285 removed individuals in the population at time  $t$ , by  $q_M(I^*, R^*, t)$ . In other words:

$$286 \quad q_M(I^*, R^*, t) = \mathbf{P}(I(t_{\max}) + R(t_{\max}) \geq M | I(t) = I^*, R(t) = R^*). \quad (10)$$

287 By choosing  $t_{\max}$  to be longer than the timescale of any local outbreak,  $q_M(I^*, R^*, t)$  is  
288 equivalent to the probability that at least  $M$  infections occur prior to outbreak  
289 extinction.

290 We discretise the time interval  $[0, t_{\max}]$  into  $n$  time steps, each of length  $\Delta t$ , where  $\Delta t$  is  
 291 chosen to be small (by choosing  $n$  to be large) so that at most one event occurs in any  
 292 time interval of length  $\Delta t$ . By conditioning on the possible events occurring in the interval  
 293  $(i\Delta t, (i + 1)\Delta t]$ , for  $i = 0, 1, \dots, \frac{t_{\max}}{\Delta t} - 1$ , we obtain:

$$\begin{aligned}
 294 \quad q_M(I^*, R^*, i\Delta t) &= \mathbf{P}(\text{infection event in interval } (i\Delta t, (i + 1)\Delta t])q_M(I^* + 1, R^*, (i + 1)\Delta t) \\
 295 &\quad + \mathbf{P}(\text{removal event in interval } (i\Delta t, (i + 1)\Delta t])q_M(I^* - 1, R^* + 1, (i + 1)\Delta t) \\
 296 &\quad + \mathbf{P}(\text{no event in interval } (i\Delta t, (i + 1)\Delta t])q_M(I^*, R^*, (i + 1)\Delta t) \\
 297 &= \beta(i\Delta t) \frac{(N - I^* - R^*)I^*}{N} \Delta t q_M(I^* + 1, R^*, (i + 1)\Delta t) \\
 298 &\quad + \gamma(i\Delta t) I^* \Delta t q_M(I^* - 1, R^* + 1, (i + 1)\Delta t) \\
 299 &\quad + \left( 1 - \beta(i\Delta t) \frac{(N - I^* - R^*)I^*}{N} \Delta t - \gamma(i\Delta t) I^* \Delta t \right) q_M(I^*, R^*, (i + 1)\Delta t). \quad (11)
 \end{aligned}$$

300 Since the outbreak will definitely have ended by time  $t_{\max}$ , we note that:

$$301 \quad q_M(I^*, R^*, t_{\max}) = \begin{cases} 1, & I^* + R^* \geq M \\ 0, & I^* + R^* < M \end{cases} \quad (12)$$

302 enabling us to solve system of equations (11) backwards in time to find the values of

303  $q_M(I^*, R^*, i\Delta t)$  for all values of  $I^*$ ,  $R^*$  and  $i$ . In other words, we first compute

304  $q_M\left(I^*, R^*, \left(\frac{t_{\max}}{\Delta t} - 1\right) \Delta t\right)$ , then  $q_M\left(I^*, R^*, \left(\frac{t_{\max}}{\Delta t} - 2\right) \Delta t\right)$ , and so on. The TER, assuming

305 that a single infectious individual is introduced to the host population at time  $t_0$ , is then

306 given by  $q_M(1, 0, t_0)$ .

307 We note that in principle it would be possible to rearrange system of equations (11) and

308 take the limit  $\Delta t \rightarrow 0$  to obtain a system of ODEs for  $q_M(I^*, R^*, t)$ . However, since we

309 would then be required to discretise time to solve those ODEs numerically, we solve

310 system of equations (11) directly as described above.

### 311 2.3.2 Chikungunya transmission model

312 To compute the TER for the host-vector model, we use a simulation-based approach.  
313 Specifically, we repeatedly simulate the analogous stochastic model to system of  
314 equations (6), following the simulation procedure described in section 2.1.2. In each  
315 simulation, we start with a single infectious host in the population at time  $t_0$ . The TER is  
316 then given by the proportion of model simulations in which  $I_H + R_H$  exceeds or equals  $M$   
317 prior to pathogen extinction occurring.

318

## 319 **3. Results**

### 320 3.1 SIR model

321 To begin comparing the CER and TER, we calculated these quantities for the stochastic  
322 SIR model (the analogous stochastic model to system of equations (1)) with a  
323 seasonally varying infection rate (equation (2)). We first considered a scenario in which  
324 sustained transmission is possible all year round ( $R_0(t) > 1$  for all values of  $t$ ), and set  
325 the threshold number of infections defining a “major outbreak” to be  $M = 100$  when  
326 calculating the TER. We found that the TER matches the CER closely in that scenario  
327 (orange and blue lines in Fig 2A). Not only did we calculate the TER numerically using  
328 system of equations (11) (orange line in Fig 2A), but we also calculated the TER using  
329 repeated model simulation. To do this, we assumed that there was a single infected  
330 individual in the population at the time of pathogen introduction,  $t_0$  (i.e.  $S(t_0) = N -$   
331  $1, I(t_0) = 1$  and  $R(t_0) = 0$ ), ran 10,000 simulations of the stochastic SIR model and  
332 then computed the proportion of simulations in which the number of infections



333 exceeded or equalled  $M = 100$  prior to outbreak extinction. We repeated this for a  
334 range of values of the time of introduction,  $t_0$  (orange dots in Fig 2A).  
335 While the CER and TER matched closely when transmission was possible all year round  
336 (as was the case in previous studies in which the CER was calculated, e.g. [29]), we  
337 then went on to consider a second scenario in which sustained transmission is only  
338 possible for some of the year (Fig 2B). In that scenario, outbreaks with at least  $M = 100$   
339 infections were possible for some pathogen introduction times, leading to values of the  
340 TER that were greater than zero (orange line and dots in Fig 2B). However, since  
341 pathogen extinction always eventually occurred during time periods in which  
342 transmission was not possible, the CER took the value zero at all pathogen introduction  
343 times (blue line in Fig 2B).  
344 Although we only considered a single introduced case in Fig 2, we also conducted a  
345 supplementary analysis in which we considered multiple pathogen introductions when  
346 calculating the TER (Fig S1.1).

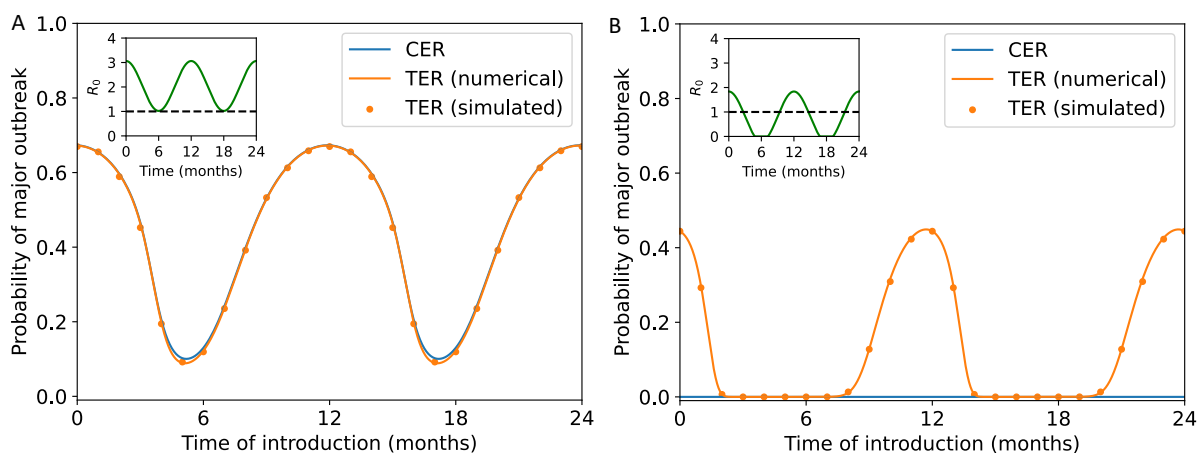

347

348 **Figure 2. Comparison between calculated values of the CER and TER for the stochastic SIR model**  
349 **with seasonal transmission.** A. The CER (obtained using equation (8) – blue line) and the TER (obtained  
350 by solving system of equations (11) numerically – orange line – and by running model simulations – orange

351 dots) when sustained transmission is possible throughout the year ( $\beta_0 = 10$ ,  $\beta_1 = 5$  and  $\gamma = 4.9 \text{ month}^{-1}$ ).  
352 B. Analogous results to panel A, but in a scenario in which sustained transmission can only occur for  
353 some of the year ( $\beta_0 = 4$ ,  $\beta_1 = 5$  and  $\gamma = 4.9 \text{ month}^{-1}$ ). In both panels, a threshold of  $M = 100$  was used  
354 when computing the TER and the overall population size was assumed to be  $N = 1,000$  individuals. When  
355 we computed the TER using model simulations, we ran 10,000 simulations of the stochastic model (using  
356 the simulation approach described in Section 2.1.1) for each time of introduction considered. In both  
357 panels, the inset shows  $R_0(t) = \beta(t)/\gamma(t)$  as a function of  $t$ .

358

359 We then explored the effect of the duration of time in the year for which sustained  
360 transmission is impossible on the mismatch between the CER and TER in more detail.  
361 Specifically, we considered varying the value of  $\beta_0$  and again calculated the CER and  
362 TER (Fig 3). As in Fig 2B, whenever transmission is not possible for long periods of the  
363 year, the CER always takes the value zero yet outbreaks with at least  $M = 100$   
364 infections may still occur (Fig 3A,B). If, however, there are periods of the year for which  
365 sustained transmission is impossible, but those periods are not very long, then CER  
366 values greater than zero but less than the TER can occur. This is because there is a  
367 chance that the pathogen survives in the host population across the periods during  
368 which conditions are not suitable for sustained transmission. We note that, even in  
369 those scenarios, if the duration of the year for which sustained transmission is  
370 impossible is not very short, then the CER is likely to suggest a lower outbreak risk than  
371 the TER, at least at some times of year (Fig 3C,D). Again, when sustained transmission is  
372 possible all year round, or is only impossible for very short periods, then the CER and  
373 TER match closely (Fig 3E,F).

374 We consider a similar analysis, but instead varying the extent of seasonality in the  
375 infection rate ( $\beta_1$ ), rather than  $\beta_0$ , in Fig S1.2.

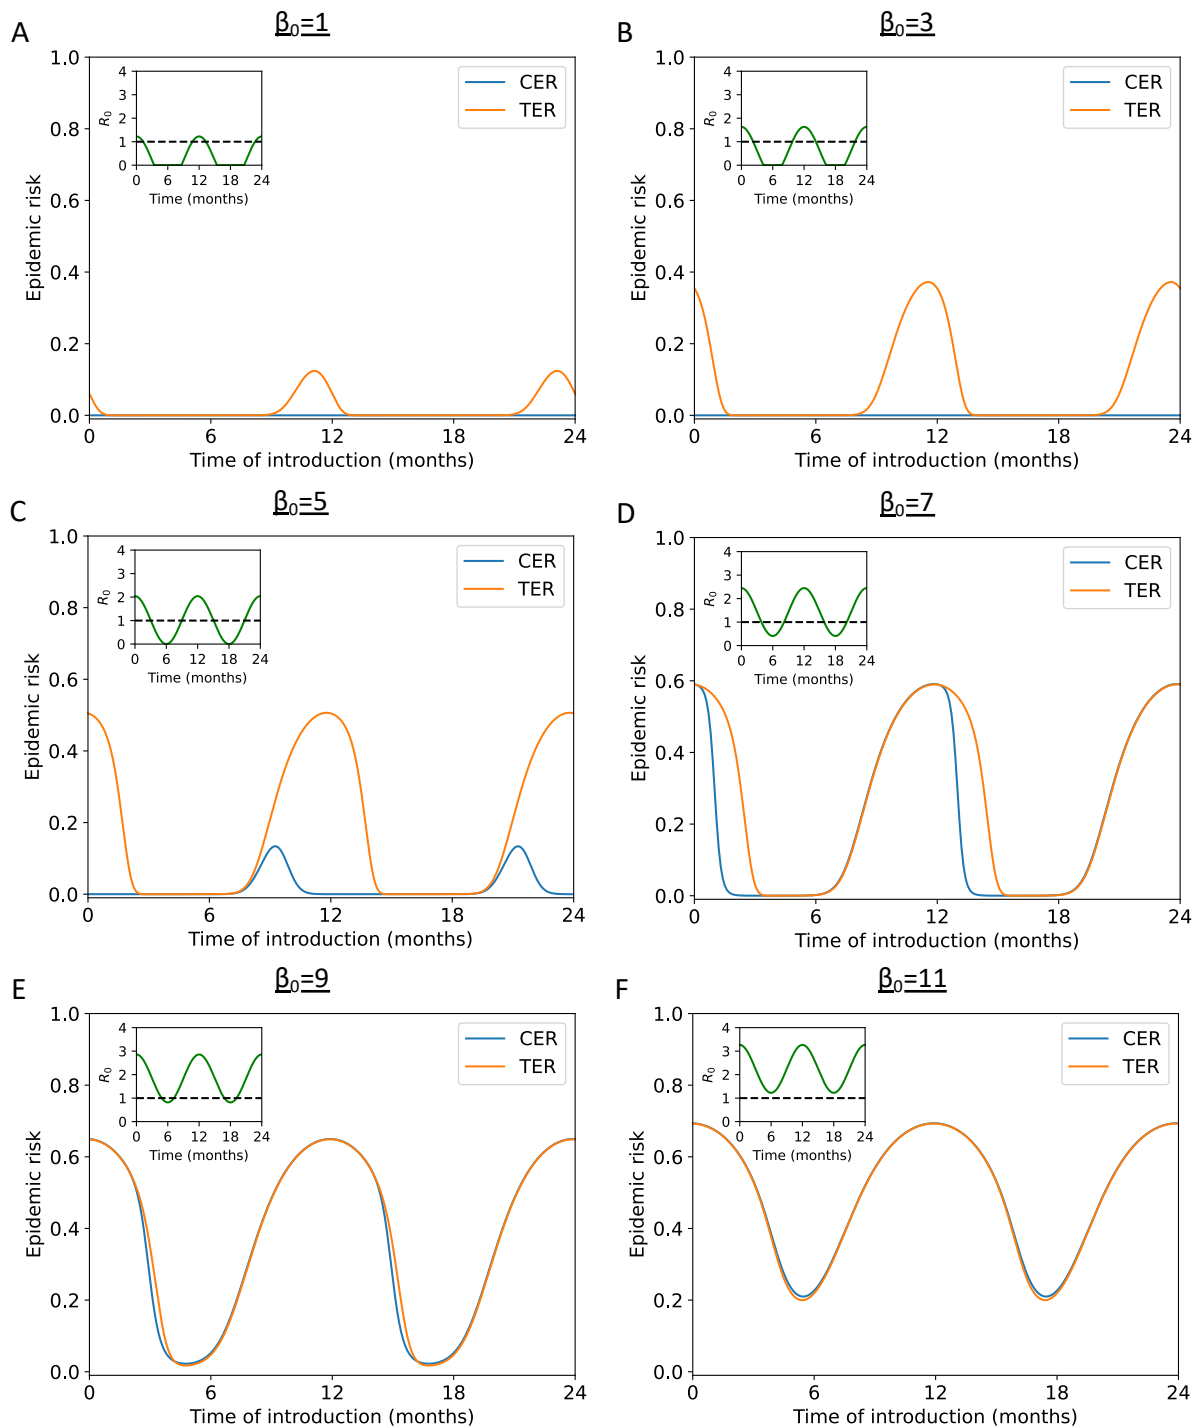

376

377 **Figure 3. Comparison between calculated values of the CER and TER for the stochastic SIR model**

378 **with seasonal transmission, for a range of values of  $\beta_0$ .** A. The CER (obtained using equation (8) – blue

379 line) and the TER (obtained by solving systems of equations (11) numerically – orange line) when

380 sustained transmission is only possible for a short period of the year ( $\beta_0 = 1$ ,  $\beta_1 = 5$  and  $\gamma = 4.9 \text{ month}^{-1}$ ).  
381 B. Analogous results to panel A, but with  $\beta_0 = 3$ . C. Analogous results to panel A, but with  $\beta_0 = 5$ . D.  
382 Analogous results to panel A, but with  $\beta_0 = 7$ . E. Analogous results to panel A, but with  $\beta_0 = 9$ . F.  
383 Analogous results to panel A, but with  $\beta_0 = 11$ . In all panels, a threshold of  $M = 100$  was used when  
384 computing the TER and the overall population size was assumed to be  $N = 1,000$  individuals. In all  
385 panels, the inset shows  $R_0(t) = \beta(t)/\gamma(t)$  as a function of  $t$ .

386

387 Having established that the TER provides a more appropriate characterisation of the risk  
388 posed by an invading seasonal pathogen than the CER, we considered the sensitivity of  
389 the TER to the precise threshold number of infections,  $M$ , chosen (Fig 4). Specifically,  
390 we considered both the value of the TER and the duration of the year for which the TER  
391 is above a particular value,  $z$  (in Fig 4,  $z = 0.1$ ). For the transmission parameter values  
392 used in Fig 4 ( $\beta_0 = 4$ ,  $\beta_1 = 5$  and  $\gamma = 4.9 \text{ month}^{-1}$ ), we found that the duration of the year  
393 in which the TER exceeds  $z = 0.1$  was relatively similar for a range of different values of  
394  $M$ . For example, if  $M = 200$  was used (corresponding to 20% of the host population),  
395 then the TER exceeded  $z = 0.1$  for 5.36 months per year, whereas if instead  $M = 400$   
396 was used (corresponding to 40% of the host population), then the TER exceeded  $z = 0.1$   
397 for 4.60 months per year. We repeated this analysis for different values of  $z$  in Fig S1.3,  
398 and found similar results.

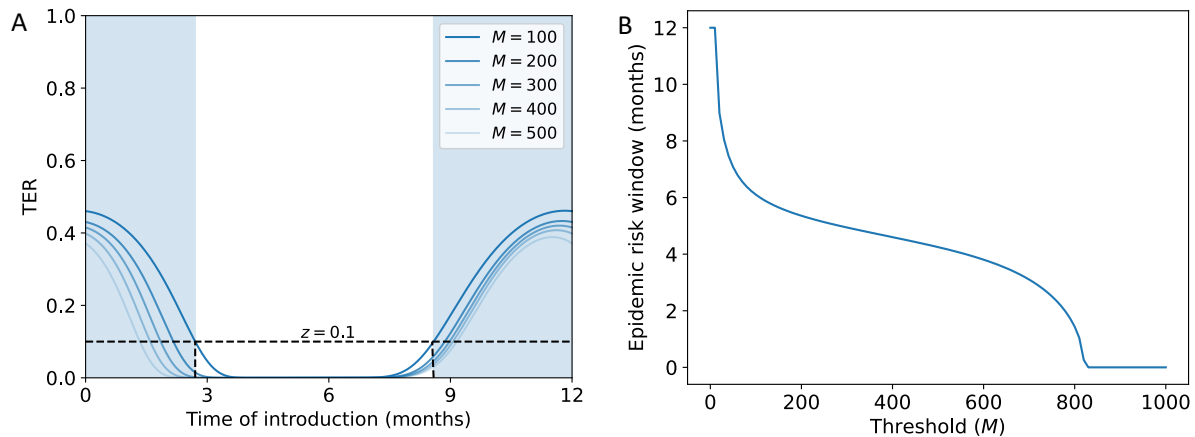

399

400 **Figure 4. Sensitivity of the TER to the value of  $M$  chosen for the stochastic SIR model with seasonal**  
401 **transmission.** A. The TER (obtained by solving systems of equations (11) numerically) for a range of  
402 different values of the threshold number of infections,  $M$ . The blue shaded region shows the period of the  
403 year for which the TER exceeds  $z = 0.1$  for the baseline value of  $M = 100$ . B. The duration of the year for  
404 which the TER exceeds  $z = 0.1$ , shown as a function of  $M$ . In both panels,  $\beta_0 = 4$ ,  $\beta_1 = 5$  and  $\gamma = 4.9$   
405 month<sup>-1</sup>. The overall population size was assumed to be  $N = 1,000$  individuals.

406

### 407 3.2 Chikungunya transmission model

408 To demonstrate the application of our framework for inferring the risk posed by an  
409 invading seasonal pathogen to a real-world case study, we estimated the TER for  
410 chikungunya in the town of Feltre, Italy, using daily mean temperature data from 2014  
411 and 2015. The risk that an imported case will initiate a local outbreak varies during the  
412 year in that setting due to the seasonal dynamics of the *Ae. albopictus* vector  
413 population.

414 First, we fitted equation (4) to the temperature data from Feltre from 2014 (Fig S1.4A)  
415 and 2015 (Fig S1.4B). We then used these fitted temperature values to determine the  
416 number of adult female vectors per hectare throughout the year, initially by numerically

417 solving system of equations (3) to obtain the number of adult female vectors at the start  
418 of each month (blue dots in Fig S1.4C,D) and then by fitting equation (5) to those  
419 monthly values (blue lines in Fig S1.4C,D). Finally, we computed the TER in 2014 (Fig 5A)  
420 and 2015 (Fig 5B) using model simulations, for a range of different values of the  
421 threshold number of infections defining a major outbreak,  $M$ . In addition to plotting the  
422 TER, we computed the CER and found that the CER was zero throughout each year due  
423 to the inevitable extinction of the pathogen during seasons in which environmental  
424 conditions are not conducive to transmission. Specifically, outside the summer  
425 months, low temperatures drive the vector population size down to a low level, making  
426 sustained transmission of Chikungunya impossible. This again highlights the  
427 importance of using the TER, rather than the CER, to quantify seasonal outbreak risks.

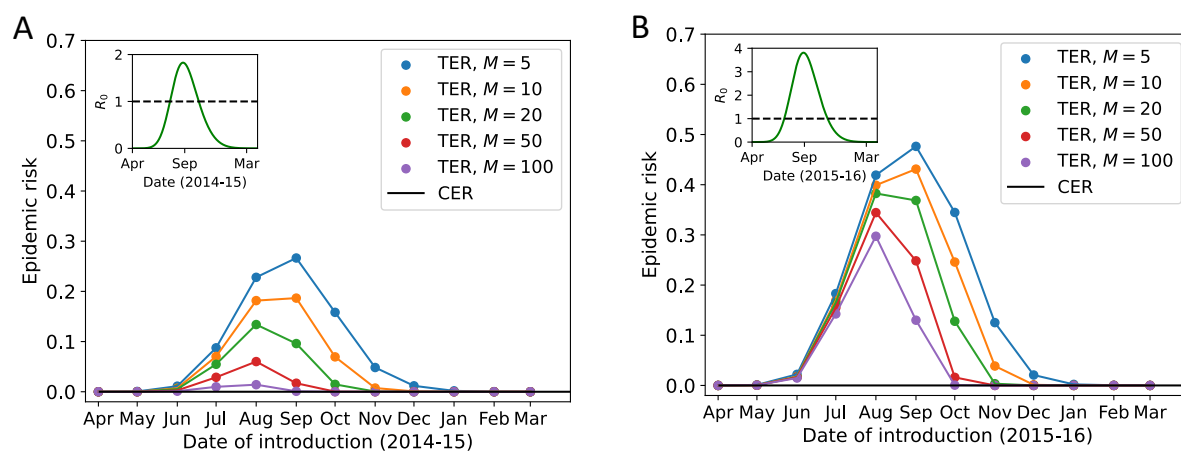

428

429 **Figure 5. Calculation of the TER for chikungunya in Feltre, northern Italy, in 2014 and 2015.** A. The  
430 TER for 2014 (and early 2015), shown for a range of values of the threshold number of infections,  $M$ . The  
431 CER is also shown (obtained using system of equations (9) – black line). B. Analogous to panel A, but for  
432 2015 (and early 2016). In both panels, to compute the CER we ran 10,000 simulations of the stochastic  
433 model (using the simulation approach described in Section 2.1.2) for each date of introduction  
434 considered, and the host population size was assumed to be  $N = 5,000$  individuals (based on the  
435 population density in Feltre [44], this corresponds to an area of 80 Ha; the numbers of adult female

436 vectors were also scaled up from their per Ha values shown in Fig S1.4C,D). In both panels, the inset  
437 shows  $R_0(t)$  as a function of  $t$  (equation (7)).

438

#### 439 **4. Discussion**

440 For many infectious diseases, quantifying the risk that imported cases will initiate a  
441 “major outbreak” driven by local transmission is of vital importance for public health  
442 policy. This is especially pertinent for seasonal pathogens that are not present at certain  
443 times of year, since pathogen reintroduction leading to sustained local transmission is  
444 necessary for large numbers of cases to arise. Identification of high risk locations and  
445 time periods allows policy-makers to target surveillance and control interventions  
446 appropriately.

447 Previous studies have provided a range of methods for calculating the probability of a  
448 major outbreak. For directly transmitted pathogens for which the parameters governing  
449 transmission do not vary temporally, the probability of a major outbreak starting from a  
450 single infected individual can be approximated by  $1 - 1/R_0$  (whenever  $R_0 > 1$ ), in which  
451  $R_0$  is the basic reproduction number of the pathogen [50]. When transmission  
452 parameter values vary temporally, a more complex calculation is required, and an  
453 established method [29,34–41] gives rise to the quantity that we term the CER here. The  
454 CER has previously been calculated for a range of models, including the stochastic SIR  
455 model with seasonally varying transmission [29,34–41], host-vector models [29,40],  
456 and models that account for varying susceptible population sizes [15,20].

457 As we have shown, when sustained transmission is possible all year around, the CER  
458 provides a useful measure of the risk that an introduced case will initiate local

459 transmission (Figs 2A, 3F). However, when sustained transmission cannot occur for  
460 substantial periods of the year (e.g. over winter, as is the case for vector-borne  
461 pathogens in temperate climates), then the CER can underestimate the true risk of a  
462 substantial outbreak occurring, including scenarios in which outbreaks with large  
463 numbers of cases can occur yet the CER takes the value zero (Figs 2B, 3A,B). For this  
464 reason, we have proposed a new quantity that can be calculated for assessing the  
465 probability of a major outbreak. Specifically, the TER represents the probability that  
466 introduced cases initiate an outbreak with more than  $M$  infections prior to outbreak  
467 extinction.

468 The risk of an outbreak with more than a threshold number of cases occurring has been  
469 considered before for pathogens for which transmission parameters remain constant in  
470 time [30]. In that scenario, the TER tends to match classic estimates for the probability  
471 of a major outbreak for a range of values of  $M$ , at least when  $R_0$  is sufficiently larger than  
472 one. In contrast, for seasonal pathogens, as noted above there are scenarios in which  
473 substantial outbreaks can occur but the CER is zero, demonstrating a clear mismatch  
474 between standard estimates for the probability of a major outbreak and estimates with  
475 clear practical meaning such as the TER.

476 Although we found that the precise value of  $M$  chosen did not always affect the  
477 calculated value of the TER substantially (Fig 4), the value of  $M$  may be chosen by  
478 policy-makers in a context specific fashion. For example, for a pathogen such as the  
479 dengue virus in Italy, even relatively small outbreaks would be considered substantial.  
480 Since 2010, each dengue outbreak in Europe has resulted in fewer than 100 reported  
481 cases [51]. Therefore, even outbreaks with tens of cases might be considered large in



482 that setting, suggesting that a value of  $M$  of that order of magnitude might be  
483 appropriate. In practice, if mathematical modellers undertake calculation of the TER,  
484 then we contend that this should be done for any specific outbreak in consultation with  
485 policy-makers, to ensure that an appropriate value of  $M$  is used. Alternatively, the TER  
486 could be computed for a range of values of  $M$ , so that estimates of the risk of outbreaks  
487 of a range of different sizes are obtained.

488 As we showed by applying our approach to the case-study of chikungunya in northern  
489 Italy (Fig 5), the methodology presented here is particularly relevant in the context of  
490 vector-borne diseases in locations that experience seasonal outbreaks. Going forwards,  
491 the risk of vector-borne disease outbreaks is expected to increase in some locations  
492 due to climate change [52,53]. Calculation of the TER across a range of places and at  
493 different times of year can provide insights into changes in the spatio-temporal risk of  
494 outbreaks and support the adoption of preventive measures [44].

495 In addition to demonstrating that the CER does not provide an appropriate assessment  
496 of the risk of seasonal outbreaks in a real-world scenario, three features are particularly  
497 noticeable from our TER calculations in Fig 5. First, relatively small differences in  
498 temperature between years (Fig S1.4A,B) can drive more substantial differences in the  
499 vector population size (Fig S1.4C,D), and therefore in the risk posed by outbreaks (Fig 5).  
500 Second, the choice of value of  $M$  affects the time of pathogen introduction at which the  
501 TER is maximised. Specifically, larger values of  $M$  require longer outbreaks for the  
502 threshold number of infections to be exceeded. As a result, larger values of  $M$  tend to  
503 lead to earlier peak values of the TER, in order for there to be sufficient time left in the  
504 transmission season for such large outbreaks to occur. Third, and relatedly, the level of

505 variation in the TER between different values of  $M$  can change during the year. In Fig 5B,  
506 for example, early in the transmission season the TER was similar across the range of  
507 values of  $M$  considered. This is because simulated outbreaks tended to either fade out  
508 with few infections or large numbers of infections (more than 100) occurred. In contrast,  
509 later in the transmission season, because of the limited time period remaining until  
510 sustained transmission became impossible, outbreaks of a range of different sizes  
511 could arise. This highlights the need to consider the value of  $M$  used when calculating  
512 the TER carefully in some scenarios.

513 In summary, we have developed a novel framework for seasonal pathogens that can be  
514 used to compute the probability that an initial infected case (or cases) initiates a “major  
515 outbreak”. Rather than basing our approach on the mathematical theory of branching  
516 processes, which can lead to unrealistic assessments of seasonal outbreak risks, we  
517 calculate the TER (i.e., the probability that the number of infections will exceed a pre-  
518 specified threshold value) directly. For simple stochastic epidemic models that account  
519 for seasonality, the TER can be calculated numerically. For more complex models, the  
520 TER can be estimated using model simulations, enabling it to be determined for any  
521 epidemiological system for which repeated model simulation is possible. Going  
522 forwards, we hope that our flexible approach will be used by epidemiological modellers  
523 to obtain policy-relevant outbreak risk assessments for a range of seasonal pathogens.

524

## 525 **COMPETING INTERESTS**

526 We have no competing interests.

527 **AUTHORS' CONTRIBUTIONS**

528 ARK – conceptualization, methodology, formal analysis, investigation, software,

529 validation, writing – original draft, writing – review and editing.

530 GG – methodology, writing – review and editing.

531 MJT – supervision, writing – review and editing.

532 RNT – conceptualization, methodology, project administration, supervision, writing –

533 original draft, writing – review and editing.

534

535 **ACKNOWLEDGEMENTS**

536 Thanks to members of the Zeeman Institute for Systems Biology and Infectious Disease

537 Epidemiology Research at the University of Warwick, the Wolfson Centre for

538 Mathematical Biology at the University of Oxford and the Centre for Health Emergencies

539 at the Bruno Kessler Foundation for useful discussions about this research.

540

541 **DATA SHARING**

542 All data generated or analysed during this study, including computing code for

543 reproducing our results, are available at:

544 [www.github.com/KayeARK/Quantifying\\_Epidemic\\_Risks](https://www.github.com/KayeARK/Quantifying_Epidemic_Risks)

545 **References**

- 546 1. Smith KF, Goldberg M, Rosenthal S, Carlson L, Chen J, Chen C, et al. Global rise in  
547 human infectious disease outbreaks. *J R Soc Interface*. 2014;11.  
548 doi:10.1098/rsif.2014.0950
- 549 2. Bloom DE, Cadarette D. Infectious disease threats in the twenty-first century:  
550 Strengthening the global response. *Front Immunol*. 2019;10.  
551 doi:10.3389/fimmu.2019.00549
- 552 3. Tatem AJ, Rogers DJ, Hay SI. Global transport networks and infectious disease  
553 spread. *Adv Parasitol*. 2006;62: 293–343. doi:10.1016/S0065-308X(05)62009-X
- 554 4. Baker RE, Mahmud AS, Miller IF, Rajeev M, Rasambainarivo F, Rice BL, et al.  
555 Infectious disease in an era of global change. *Nat Rev Microbiol*. 2022;20: 193–  
556 205. doi:10.1038/s41579-021-00639-z
- 557 5. Massad E, Amaku M, Coutinho FAB, Struchiner CJ, Burattini MN, Khan K, et al.  
558 Estimating the probability of dengue virus introduction and secondary  
559 autochthonous cases in Europe. *Sci Rep*. 2018;8. doi:10.1038/s41598-018-  
560 22590-5
- 561 6. Guzzetta G, Vairo F, Mammone A, Lanini S, Poletti P, Manica M, et al. Spatial  
562 modes for transmission of Chikungunya virus during a large chikungunya  
563 outbreak in Italy: A modeling analysis. *BMC Med*. 2020;18. doi:10.1186/s12916-  
564 020-01674-y
- 565 7. Hotez PJ. Southern Europe’s coming plagues: Vector-borne neglected tropical  
566 diseases. *PLoS Negl Trop Dis*. 2016;10. doi:10.1371/journal.pntd.0004243

- 567 8. Guzzetta G, Montarsi F, Baldacchino FA, Metz M, Capelli G, Rizzoli A, et al.  
568 Potential risk of dengue and chikungunya outbreaks in Northern Italy based on a  
569 population model of *Aedes albopictus* (Diptera: Culicidae). PLoS Negl Trop Dis.  
570 2016;10. doi:10.1371/journal.pntd.0004762
- 571 9. Alto BW, Juliano SA. Precipitation and temperature effects on populations of  
572 *Aedes albopictus* (Diptera: Culicidae): Implications for range expansion. J Med  
573 Entomol. 2001. doi:10.1603/0022-2585-38.5.646
- 574 10. Juliano SA, O'Meara GF, Morrill JR, Cutwa MM. Desiccation and thermal tolerance  
575 of eggs and the coexistence of competing mosquitoes. Oecologia. 2002;130:  
576 458–469. doi:10.1007/s004420100811
- 577 11. Yang HM, Macoris MLG, Galvani KC, Andrighetti MTM, Wanderley DMV. Assessing  
578 the effects of temperature on the population of *Aedes aegypti*, the vector of  
579 dengue. Epidemiol Infect. 2009;137: 1188–1202.  
580 doi:10.1017/S0950268809002040
- 581 12. Kraemer MUG, Reiner RC, Brady OJ, Messina JP, Gilbert M, Pigott DM, et al. Past  
582 and future spread of the arbovirus vectors *Aedes aegypti* and *Aedes albopictus*.  
583 Nat Microbiol. 2019;4: 854–863. doi:10.1038/s41564-019-0376-y
- 584 13. Antia R, Regoes RR, Koella JC, Bergstrom CT. The role of evolution in the  
585 emergence of infectious diseases. Nature. 2003;426: 658–661.  
586 doi:10.1038/nature02104

- 587 14. Meehan MT, Cope RC, McBryde ES. On the probability of strain invasion in  
588 endemic settings: Accounting for individual heterogeneity and control in multi-  
589 strain dynamics. *J Theor Biol.* 2020;487. doi:10.1016/j.jtbi.2019.110109
- 590 15. Hartfield M, Alizon S. Epidemiological feedbacks affect evolutionary emergence  
591 of pathogens. *Am Nat.* 2014;183. doi:10.5061/dryad.kj238
- 592 16. Yates A, Antia R, Regoes RR. How do pathogen evolution and host heterogeneity  
593 interact in disease emergence? *Proc R Soc B.* 2006;273: 3075–3083.  
594 doi:10.1098/rspb.2006.3681
- 595 17. Lloyd-Smith JO, Schreiber SJ, Kopp PE, Getz WM. Superspreading and the effect  
596 of individual variation on disease emergence. *Nature.* 2005;438: 355–359.  
597 doi:10.1038/nature04153
- 598 18. Lovell-Read FA, Funk S, Obolski U, Donnelly CA, Thompson RN. Interventions  
599 targeting non-symptomatic cases can be important to prevent local outbreaks:  
600 SARS-CoV-2 as a case study. *J R Soc Interface.* 2021;18.  
601 doi:10.1098/rsif.2020.1014
- 602 19. Lahodny Jr GE, Gautam R, Ivanek R. Estimating the probability of an extinction or  
603 major outbreak for an environmentally transmitted infectious disease. *J Biol Dyn.*  
604 2015;9: 128–155. doi:10.1080/17513758.2014.954763
- 605 20. Sachak-Patwa R, Byrne HM, Dyson L, Thompson RN. The risk of SARS-CoV-2  
606 outbreaks in low prevalence settings following the removal of travel restrictions.  
607 *Commun Med.* 2021;1. doi:10.1038/s43856-021-00038-8

- 608 21. Thompson RN. Novel coronavirus outbreak in Wuhan, China, 2020: Intense  
609 surveillance is vital for preventing sustained transmission in new locations. *J Clin*  
610 *Med.* 2020;9. doi:10.3390/jcm9020498
- 611 22. Lahodny Jr GE, Allen LJS. Probability of a disease outbreak in stochastic  
612 multipatch epidemic models. *Bull Math Biol.* 2013;75: 1157–1180.  
613 doi:10.1007/s11538-013-9848-z
- 614 23. Leventhal GE, Hill AL, Nowak MA, Bonhoeffer S. Evolution and emergence of  
615 infectious diseases in theoretical and real-world networks. *Nat Commun.* 2015;6.  
616 doi:10.1038/ncomms7101
- 617 24. Anderson D, Watson R. On the spread of a disease with gamma distributed latent  
618 and infectious periods. *Biometrika.* 1980;67: 191. doi:10.2307/2335333
- 619 25. Lovell-Read FA, Shen S, Thompson RN. Estimating local outbreak risks and the  
620 effects of non-pharmaceutical interventions in age-structured populations:  
621 SARS-CoV-2 as a case study. *J Theor Biol.* 2022;535.  
622 doi:10.1016/j.jtbi.2021.110983
- 623 26. Nishiura H, Cook AR, Cowling BJ. Assortativity and the probability of epidemic  
624 extinction: A case study of pandemic influenza a (H1N1-2009). *Interdiscip*  
625 *Perspect Infect Dis.* 2011;2011. doi:10.1155/2011/194507
- 626 27. Mugabi F, Duffy KJ, Mugisha JYT, Collins OC. Determining the effects of wind-  
627 aided midge movement on the outbreak and coexistence of multiple bluetongue  
628 virus serotypes in patchy environments. *Math Biosci.* 2021;342.  
629 doi:10.1016/j.mbs.2021.108718

- 630 28. Lloyd AL, Zhang J, Root AM. Stochasticity and heterogeneity in host-vector  
631 models. *J R Soc Interface*. 2007;4: 851–863. doi:10.1098/rsif.2007.1064
- 632 29. Kaye AR, Hart WS, Bromiley J, Iwami S, Thompson RN. A direct comparison of  
633 methods for assessing the threat from emerging infectious diseases in seasonally  
634 varying environments. *J Theor Biol*. 2022;548. doi:10.1016/j.jtbi.2022.111195
- 635 30. Thompson RN, Gilligan CA, Cunniffe NJ. Will an outbreak exceed available  
636 resources for control? Estimating the risk from invading pathogens using practical  
637 definitions of a severe epidemic: Will an outbreak exceed available resources for  
638 control? Estimating the risk from invading pathogens using practical definitions of  
639 a severe epidemic. *J R Soc Interface*. 2020;17. doi:10.1098/rsif.2020.0690
- 640 31. Althaus CL, Low N, Musa EO, Shuaib F, Gsteiger S. Ebola virus disease outbreak in  
641 Nigeria: Transmission dynamics and rapid control. *Epidemics*. 2015;11: 80–84.  
642 doi:10.1016/j.epidem.2015.03.001
- 643 32. Hellewell J, Abbott S, Gimma A, Bosse NI, Jarvis CI, Russell TW, et al. Feasibility of  
644 controlling COVID-19 outbreaks by isolation of cases and contacts. *Lancet Glob  
645 Health*. 2020;8: e488–e496. doi:10.1016/S2214-109X(20)30074-7
- 646 33. Thompson RN, Thompson MJ, Hurrell JW, Sun L, Obolski U. Assessing the threat  
647 of major outbreaks of vector-borne diseases under a changing climate.  
648 *Astrophysics and Space Science Proceedings*. Springer Science and Business  
649 Media B.V.; 2020. pp. 25–35. doi:10.1007/978-3-030-55336-4\_5
- 650 34. Kendall DG. On the generalized “birth-and-death” process. *Ann Math Stat*.  
651 1948;19: 1–15. doi:10.1214/aoms/1177730285



- 652 35. Nipa KF, Allen LJS. Disease emergence in multi-patch stochastic epidemic  
653 models with demographic and seasonal variability. *Bull Math Biol.* 2020;82.  
654 doi:10.1007/s11538-020-00831-x
- 655 36. Ball F. The threshold behaviour of epidemic models. *J Appl Probab.* 1983;20: 227–  
656 241. doi:10.2307/3213797
- 657 37. Bacaër N, Ait Dads EH. On the probability of extinction in a periodic environment.  
658 *J Math Biol.* 2014;68: 533–548. doi:10.1007/s00285-012-0623-9
- 659 38. Bacaër N, Ed-Darraz A. On linear birth-and-death processes in a random  
660 environment. *J Math Biol.* 2014;69: 73–90. doi:10.1007/s00285-013-0696-0
- 661 39. Bacaër N. Deux modèles de population dans un environnement périodique lent  
662 ou rapide. *J Math Biol.* 2020;80: 1021–1037. doi:10.1007/s00285-019-01447-z
- 663 40. Carmona P, Gandon S. Winter is coming: Pathogen emergence in seasonal  
664 environments. *PLoS Comput Biol.* 2020;16. doi:10.1371/journal.pcbi.1007954
- 665 41. Bacaër N, Lobry C, Sari T. Sur la probabilité d’extinction d’une population dans un  
666 environnement périodique lent. *ARIMA Journal.* 2020;32: 81–95.
- 667 42. Wang X, Saad-Roy CM, van den Driessche P. Stochastic model of Bovine  
668 Babesiosis with juvenile and adult cattle. *Bull Math Biol.* 2020;82.  
669 doi:10.1007/s11538-020-00734-x
- 670 43. Thompson RN, Jalava K, Obolski U. Sustained transmission of Ebola in new  
671 locations: more likely than previously thought. *Lancet Infect Dis.* 2019;19: 1058–  
672 1059. doi:10.1016/S1473-3099(19)30483-9

- 673 44. Guzzetta G, Trentini F, Poletti P, Baldacchino FA, Montarsi F, Capelli G, et al.  
674 Effectiveness and economic assessment of routine larviciding for prevention of  
675 chikungunya and dengue in temperate urban settings in Europe. *PLoS Negl Trop*  
676 *Dis.* 2017;11. doi:10.1371/journal.pntd.0005918
- 677 45. Norris JR. *Markov Chains*. Cambridge University Press; 1997.  
678 doi:10.1017/CBO9780511810633
- 679 46. Gillespie DT. Exact stochastic simulation of coupled chemical reactions. *J Phys*  
680 *Chem.* 1977. doi:10.1021/j100540a008
- 681 47. Thanh VH, Priami C. Simulation of biochemical reactions with time-dependent  
682 rates by the rejection-based algorithm. *J Chem Phys.* 2015;143.  
683 doi:10.1063/1.4927916
- 684 48. Mastin AJ, Gottwald TR, van den Bosch F, Cunniffe NJ, Parnell S. Optimising risk-  
685 based surveillance for early detection of invasive plant pathogens. *PLoS Biol.*  
686 2020;18. doi:10.1371/journal.pbio.3000863
- 687 49. Driscoll TA, Hale N. *Chebfun Guide*. Pafnuty Publications, Oxford; 2014.
- 688 50. Allen LJS, Lahodny GE. Extinction thresholds in deterministic and stochastic  
689 epidemic models. *J Biol Dyn.* 2012;6: 590–611.  
690 doi:10.1080/17513758.2012.665502
- 691 51. European Centre for Disease Prevention and Control. Local transmission of  
692 dengue virus in mainland EU/EEA, 2010-present. 2024. Available:  
693 [https://www.ecdc.europa.eu/en/all-topics-z/dengue/surveillance-and-disease-](https://www.ecdc.europa.eu/en/all-topics-z/dengue/surveillance-and-disease-data/autochthonous-transmission-dengue-virus-eueea)  
694 [data/autochthonous-transmission-dengue-virus-eueea](https://www.ecdc.europa.eu/en/all-topics-z/dengue/surveillance-and-disease-data/autochthonous-transmission-dengue-virus-eueea)

- 695 52. Ryan SJ, Carlson CJ, Mordecai EA, Johnson LR. Global expansion and  
696 redistribution of *Aedes*-borne virus transmission risk with climate change. PLoS  
697 Negl Trop Dis. 2018;13. doi:10.1371/journal.pntd.0007213
- 698 53. Fischer D, Thomas SM, Niemitz F, Reineking B, Beierkuhnlein C. Projection of  
699 climatic suitability for *Aedes albopictus* Skuse (Culicidae) in Europe under  
700 climate change conditions. Glob Planet Change. 2011;78: 54–64.  
701 doi:10.1016/j.gloplacha.2011.05.008
- 702
